# Supplementary material for: Exploration of 3D NiCu-layered double hydroxide flowers tailored on a biomass-derived N-doped carbon stick electrode as a binder-less enzyme-free urea sensing probe
Source: Royal Society of Chemistry journal article supplement (doi:10.1039/d3tc01448g), 2023-01-01
Supplement: d3tc01448g1.pdf [file d3tc01448g1.pdf]

# Exploration of 3D NiCu-layered double hydroxide flowers tailored on biomass-derived N-doped carbon stick electrode as a binder-less enzyme-free urea sensing probe

**Ameer Farithkhan<sup>a</sup>, N. S. K. Gowthaman<sup>b</sup>, Hong Ngee Lim<sup>c,\*</sup> and S. Meenakshi<sup>a,\*</sup>**

<sup>a</sup>Department of Chemistry, The Gandhigram Rural Institute-Deemed to be University,  
Gandhigram 624 302, Tamil Nadu, India

<sup>b</sup>School of Engineering, Monash University, Bandar Sunway, Selangor 47500, Malaysia

<sup>c</sup>Department of Chemistry, Faculty of Science, University Putra Malaysia, 43400 UPM  
Serdang, Selangor, Malaysia

\* Corresponding Authors:

H.N. Lim, Email: [hongngee@upm.edu.my](mailto:hongngee@upm.edu.my), Tel.: +60 163301609

S. Meenakshi, Email: [sankaranmeenakshi2014@gmail.com](mailto:sankaranmeenakshi2014@gmail.com), Tel.: +91 9443838121

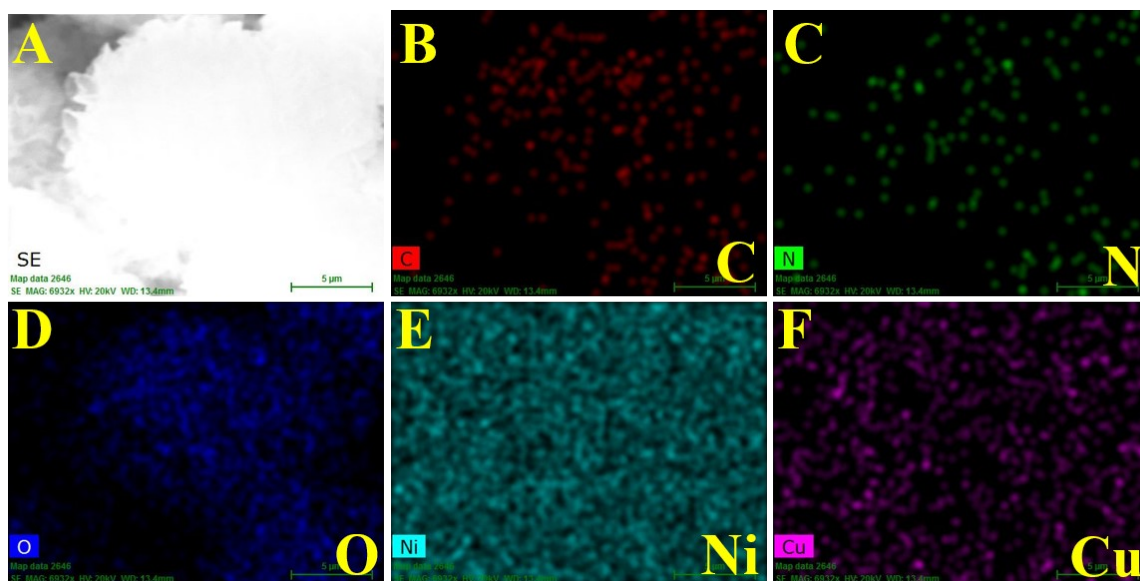

**Fig. S1.** (A) SEM image of NC-87 and its elemental mapping of (B) C, (C) N, (D) O, (E) Ni and (F) Cu.

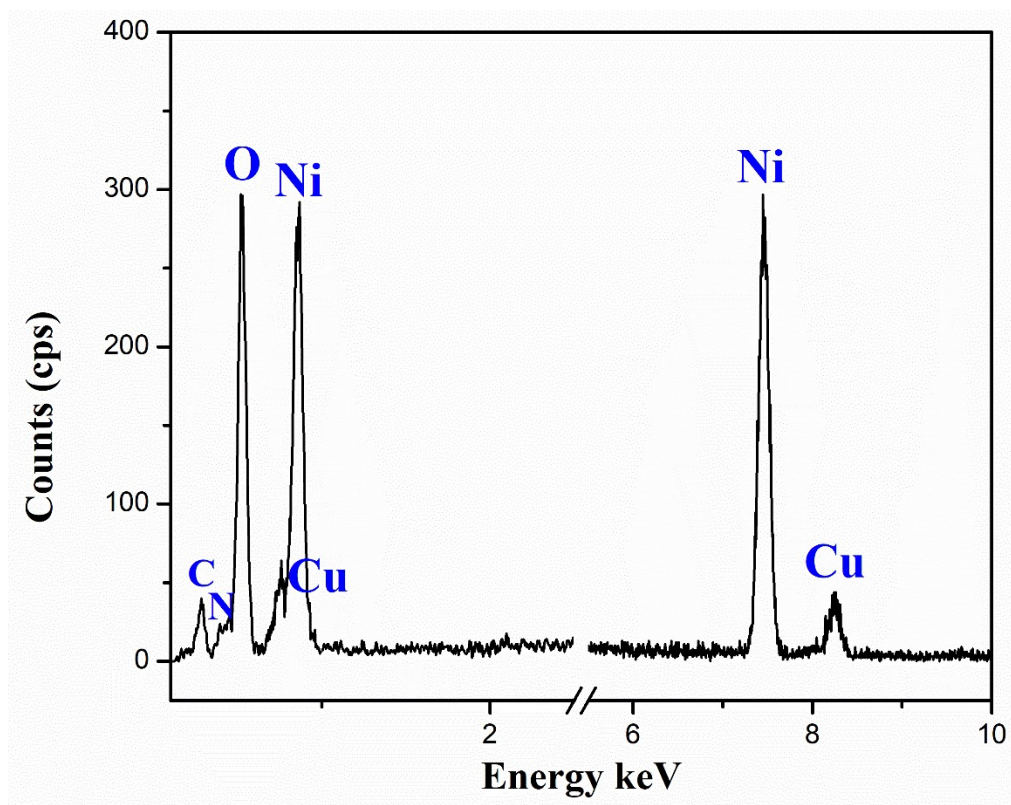

**Fig. S2.** EDAX patterns of NC-87 sensor.

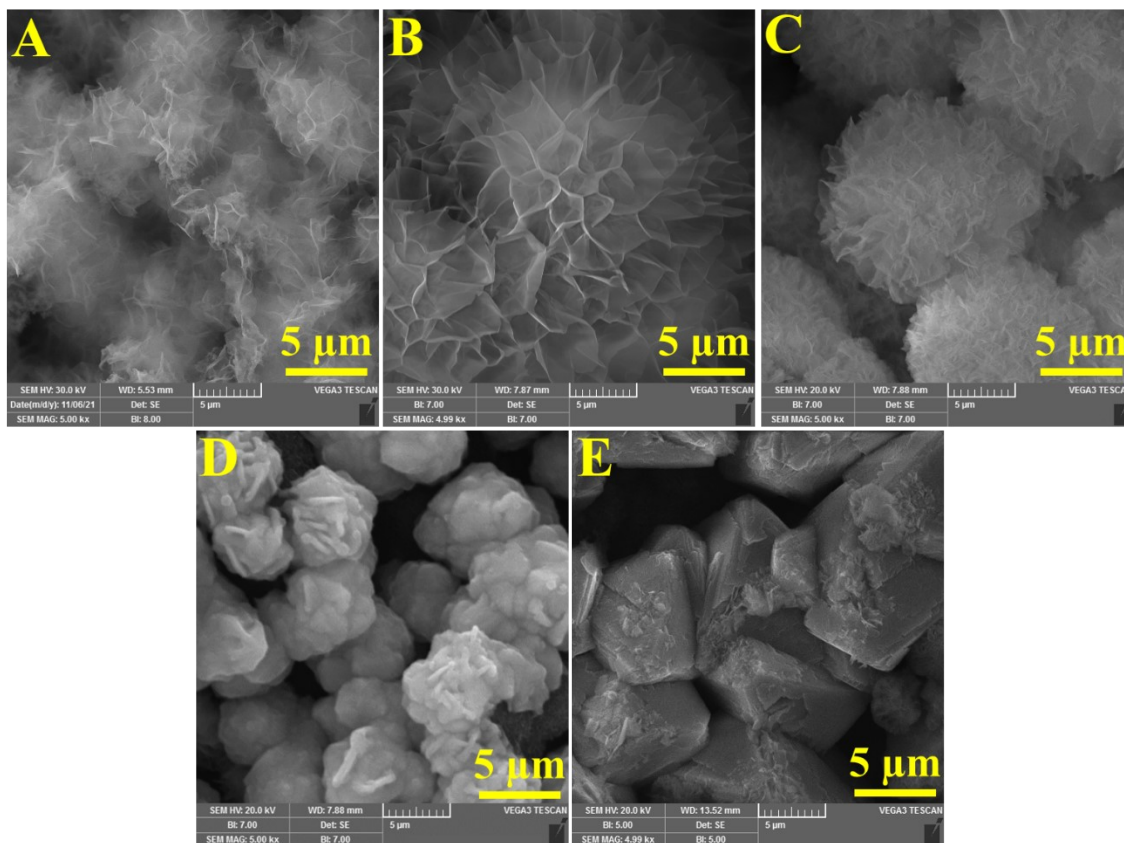

**Fig. S3.** SEM images of (A) NC-100, (B) NC-87, (C) NC-75, (D) NC-50 and (E) NC-0.

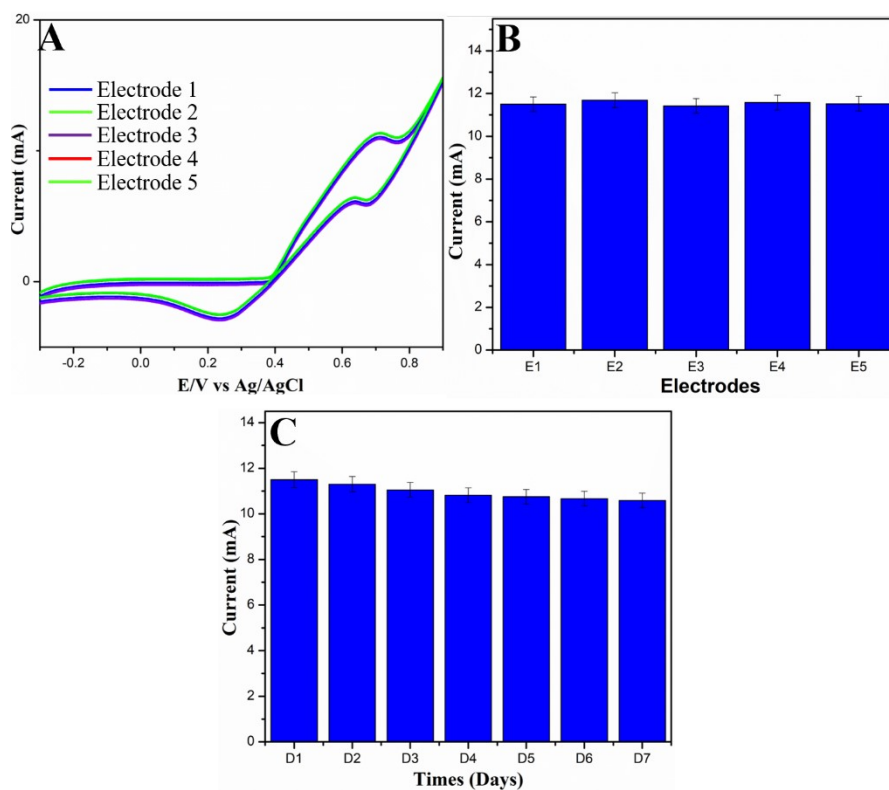

**Fig. S4.** Reproducibility (A, B) and stability (C) of NC-87 electrodes in 0.1 M KOH containing 2 mM urea at a scan rate of  $50 \text{ mV s}^{-1}$ .

**Table S1.** Comparison of the performance of NF-87 electrode towards urea sensing with the reported papers

| <b>Sensor Materials</b>                              | <b>Type</b>          | <b>Linear range (mM)</b> | <b>LOD<sup>A</sup> (mM)</b> | <b>Sensitivity</b>                                   | <b>Ref.</b> |
|------------------------------------------------------|----------------------|--------------------------|-----------------------------|------------------------------------------------------|-------------|
| Gr <sup>a</sup> -PANi <sup>b</sup> /GCE <sup>c</sup> | Enzyme-free          | 0.01-0.2                 | 0.0059                      | 226.9 $\mu\text{A } \mu\text{m}^{-1} \text{cm}^{-2}$ | (1)         |
| Urs <sup>d</sup> -PANi-nafion/Au                     | Urease               | 1-10                     | 1                           | 4.2 $\mu\text{A mM}^{-1} \text{cm}^{-2}$             | (2)         |
| PPy <sup>e</sup> /GCE                                | Enzyme-free          | 0.08-1.36                | 0.04                        | 1.11 $\mu\text{A } \mu\text{M}^{-1} \text{cm}^{-2}$  | (3)         |
| SnO <sub>2</sub> film/Al sheet                       | Enzyme-free          | 1-20                     | 0.6                         | 18.9 $\mu\text{A mM}^{-1}$                           | (4)         |
| PANi/CdS-QDs <sup>f</sup> /PDA <sup>g</sup> -Ni      | Enzyme-free          | 0.1-10                   | 0.047                       | -                                                    | (5)         |
| AgNP <sup>h</sup> -deposited commercial Au-Pd        | Enzyme-free          | 1-8                      | 0.14                        | 9.212 $\mu\text{A mM}^{-1}$                          | (6)         |
| Urs-GLDH <sup>i</sup> /GOS <sup>j</sup>              | Urease and glutamate | 3.3-19.9                 | 2.1                         | 2.6 $\text{mA mM}^{-1} \text{cm}^{-2}$               | (7)         |
| NC-LDH@NCSE                                          | Enzyme-free          | 0.02-5.0                 | 0.033                       | 21 $\text{mA mM}^{-1} \text{cm}^{-2}$                | This        |

---

<sup>A</sup>limit of detection; <sup>a</sup>graphene; <sup>b</sup>polyaniline; <sup>c</sup>glassy carbon electrode; <sup>d</sup>urease; <sup>e</sup>polypyrrole; <sup>f</sup>CdS-quantum dots; <sup>g</sup>Ni-2,3-pyrazine dicarboxylic acid; <sup>h</sup>nanoparticles; <sup>i</sup>glutamate dehydrogenase; <sup>i</sup>graphene oxide–SiO<sub>2</sub> composite electrode.

## REFERENCES

- (1) R. Sha, K. Komori, S. Badhulika, Graphene-polyaniline composite based ultra-sensitive electrochemical sensor for non-enzymatic detection of urea, *Electrochim. Acta*, 2017, **233**, 44-51.
- (2) Y.C. Luo, J.S. Do, Urea biosensor based on PANI(urease)-Nafion<sup>®</sup>/Au composite electrode, *Biosens. Bioelectron*, 2004, **20**, 15-23.
- (3) S. Mondal, M.V. Sangaranarayanan, A novel non-enzymatic sensor for urea using a polypyrrole-coated platinum electrode, *Sens. Actuators B Chem.*, 2013, **177**, 478-486.
- (4) S.G. Ansari, H. Fouad, H.S. Shin, Z-A. Ansari, Z-A, Electrochemical enzyme-less urea sensor based on nano-tin oxide synthesized by hydrothermal technique, *Chem. Biol. Interact.*, 2015, **242**, 45-49.
- (5) A. Azadbakht, M.B. Gholivand, Covalent attachment of Ni-2,3-pyrazine dicarboxylic acid onto gold nanoparticle gold electrode modified with penicillamine- CdS quantum dots for electrocatalytic oxidation and determination of urea, *Electrochim. Acta*, 2014, **124**, 9-21.
- (6) J. Liu, R.S. Moakhar, A.S. Perumal, H.N. Roman, S. Mahshid, S. Wachsmann-Hogiu, An AgNP-deposited commercial electrochemistry test strip as a platform for urea detection, *Sci. Rep.*, 2020, **10**, 9527-9538.
- (7) S. Abraham, V. Ciobota, S. Srivastava, S.K. Srivastava, R.K. Singh, J. Dellith, B.D. Malhotra, M. Schmitt, J. Popp, A. Srivastava, Mesoporous silica particle embedded functional graphene oxide as an efficient platform for urea biosensing, *Anal. Methods*, 2014, **6**, 6711-6721.
